# Supplementary material
Source: PubMed Central journal article supplement (PMC3470643)
Supplement: supp_111958_heart-tu-1-at.pdf [file supp_111958_heart-tu-1-at.pdf]

**Appendix 1:** Temporal trends in crude and risk-adjusted mortality and readmission rates of patients newly diagnosed with heart failure identified in the inpatient setting by one hospitalization or in the outpatient setting by one outpatient claim\*

|                                         | 1997           | 1999           | 2001           | 2003           | 2005           | 2007           | % change<br>1997-2007 | <i>p</i> value |
|-----------------------------------------|----------------|----------------|----------------|----------------|----------------|----------------|-----------------------|----------------|
| <b>Overall mortality rates, %</b>       | <i>n=53437</i> | <i>n=55198</i> | <i>n=54632</i> | <i>n=49237</i> | <i>n=48218</i> | <i>n=46302</i> |                       |                |
| <b>30-day mortality rate</b>            |                |                |                |                |                |                |                       |                |
| Crude                                   | 9.7            | 9.7            | 9.3            | 9.4            | 9.1            | 9.0            | -7.3                  | 0.001          |
| Risk-adjusted                           | 10.2           | 9.8            | 8.9            | 9.2            | 9.0            | 9.1            | -11.2                 | 0.003          |
| <b>1-year mortality rate</b>            |                |                |                |                |                |                |                       |                |
| Crude                                   | 22.2           | 21.7           | 21.0           | 21.7           | 20.9           | 21.0           | -5.4                  | 0.026          |
| Risk-adjusted                           | 23.1           | 21.9           | 20.5           | 21.3           | 20.8           | 20.9           | -9.3                  | 0.005          |
| <b>Inpatient mortality rates, %</b>     | <i>n=17861</i> | <i>n=19019</i> | <i>n=19565</i> | <i>n=16755</i> | <i>n=15705</i> | <i>n=15044</i> |                       |                |
| <b>30-day mortality rate</b>            |                |                |                |                |                |                |                       |                |
| Crude                                   | 16.2           | 16.4           | 15.2           | 15.7           | 16.2           | 16.0           | -1.1                  | 0.44           |
| Risk-adjusted                           | 16.9           | 16.4           | 14.8           | 15.6           | 16.0           | 16.0           | -5.6                  | 0.16           |
| <b>1-year mortality rate</b>            |                |                |                |                |                |                |                       |                |
| Crude                                   | 33.7           | 33.8           | 31.7           | 32.6           | 33.7           | 33.9           | 0.6                   | 0.73           |
| Risk-adjusted                           | 35.2           | 33.9           | 31.2           | 32.4           | 33.1           | 33.1           | -5.8                  | 0.13           |
| <b>Outpatient mortality rates, %</b>    | <i>n=35576</i> | <i>n=36179</i> | <i>n=35067</i> | <i>n=32482</i> | <i>n=32513</i> | <i>n=31258</i> |                       |                |
| <b>30-day mortality rate</b>            |                |                |                |                |                |                |                       |                |
| Crude                                   | 6.5            | 6.1            | 5.9            | 6.2            | 5.6            | 5.6            | -13.0                 | 0.006          |
| Risk-adjusted                           | 6.6            | 6.3            | 5.9            | 6.0            | 5.6            | 5.8            | -13.3                 | 0.001          |
| <b>1-year mortality rate</b>            |                |                |                |                |                |                |                       |                |
| Crude                                   | 16.4           | 15.3           | 15.0           | 16.0           | 14.8           | 14.7           | -10.0                 | 0.06           |
| Risk-adjusted                           | 16.7           | 15.6           | 15.0           | 15.6           | 14.7           | 15.0           | -10.0                 | 0.004          |
| <b>Readmission for heart failure, %</b> | <i>n=15001</i> | <i>n=15891</i> | <i>n=16598</i> | <i>n=14144</i> | <i>n=13231</i> | <i>n=12651</i> |                       |                |
| <b>30-day readmission rate</b>          |                |                |                |                |                |                |                       |                |
| Crude                                   | 4.1            | 3.6            | 3.2            | 3.6            | 3.4            | 3.6            | -12.4                 | 0.11           |
| Risk-adjusted                           | 4.2            | 3.6            | 3.2            | 3.6            | 3.3            | 3.5            | -16.8                 | 0.039          |
| <b>1-year readmission rate</b>          |                |                |                |                |                |                |                       |                |
| Crude                                   | 13.2           | 11.3           | 10.2           | 11.0           | 10.8           | 10.8           | -18.2                 | 0.034          |
| Risk-adjusted                           | 13.4           | 11.4           | 10.2           | 11.1           | 10.7           | 10.6           | -20.9                 | 0.017          |

---

| <b>Readmission for any reason, %</b> | <i>n=15001</i> | <i>n=15891</i> | <i>n=16598</i> | <i>n=14144</i> | <i>n=13231</i> | <i>n=12651</i> |      |        |
|--------------------------------------|----------------|----------------|----------------|----------------|----------------|----------------|------|--------|
| <b>30-day readmission rate</b>       |                |                |                |                |                |                |      |        |
| Crude                                | 17.1           | 16.2           | 15.7           | 15.5           | 15.6           | 15.8           | -7.3 | 0.010  |
| Risk-adjusted                        | 17.4           | 16.0           | 15.3           | 15.6           | 15.7           | 15.9           | -8.9 | 0.031  |
| <b>1-year readmission rate</b>       |                |                |                |                |                |                |      |        |
| Crude                                | 48.2           | 47.4           | 46.0           | 45.8           | 45.0           | 45.0           | -6.6 | <0.001 |
| Risk-adjusted                        | 48.7           | 47.0           | 45.2           | 46.1           | 45.2           | 45.1           | -7.4 | 0.001  |

---

\* Compared to Table 4, data presented in Appendix 1 show outcomes of patients identified in the outpatient setting using a one-claim method as opposed to the two-claim method used to select the cohort of patients examined in this study. Inpatient and outpatient mortality rates refer to mortality rates of incident patients with heart failure first identified in the inpatient or outpatient settings respectively. Readmission rates are determined for incident patients first diagnosed in the hospital who survived to discharge. Mortality and readmission rates are per 100 patients.
